# Supplementary material for: Collagen nanofibril self-assembly on a natural polymeric material for the osteoinduction of stem cells in vitro and biocompatibility in vivo
Source: Royal Society of Chemistry journal article supplement (doi:10.1039/c6ra15363a), 2016-01-01
Supplement: c6ra15363a1.pdf [file c6ra15363a1.pdf]

# Supplemental Data

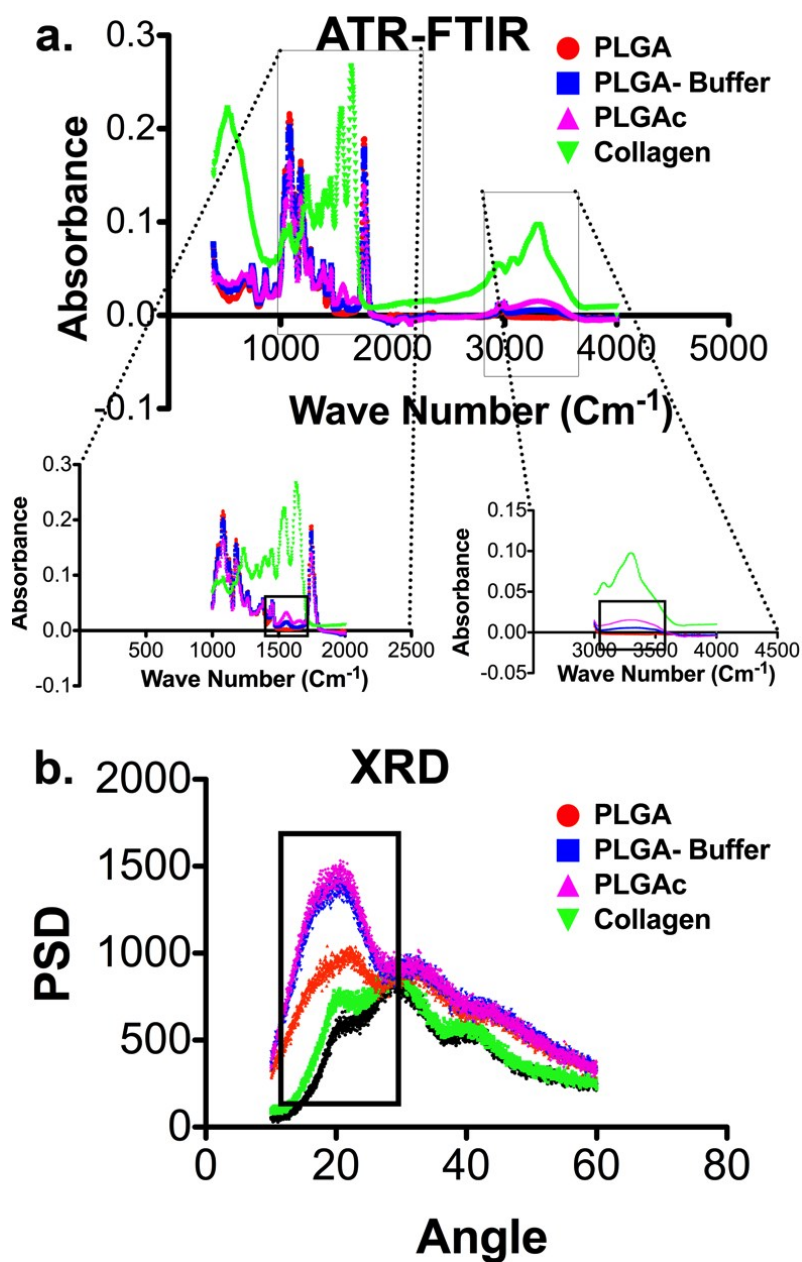

**Figure S1.** a) ATR- FTIR (from 400- 4000  $\text{cm}^{-1}$ ) and b) XRD spectra ( $2\theta = 10\text{-}60^\circ$ ) of PLGA, PLGA- buffer treated and PLGAc (Red- PLGA, blue- PLGA buffer treated, pink- PLGAc, green- lyophilized collagen).

## Supplemental Data

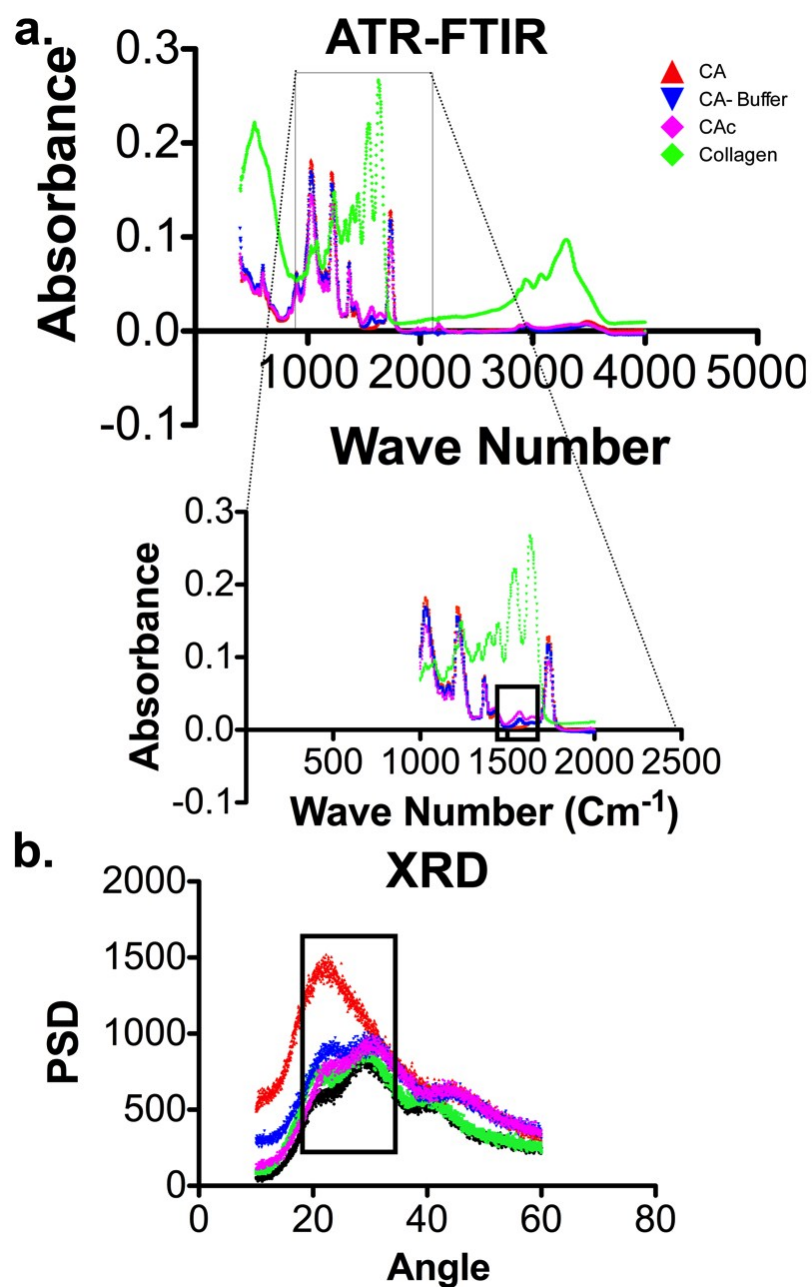

**Figure S2.** a) ATR- FTIR (from 400- 4000  $\text{cm}^{-1}$ ) and b) XRD spectra ( $2\theta = 10\text{-}60^\circ$ ) of CA, CA- buffer treated and CAC. (Red- CA, blue- CA buffer treated, pink- CAC, green- lyophilized collagen).

## Supplemental Data

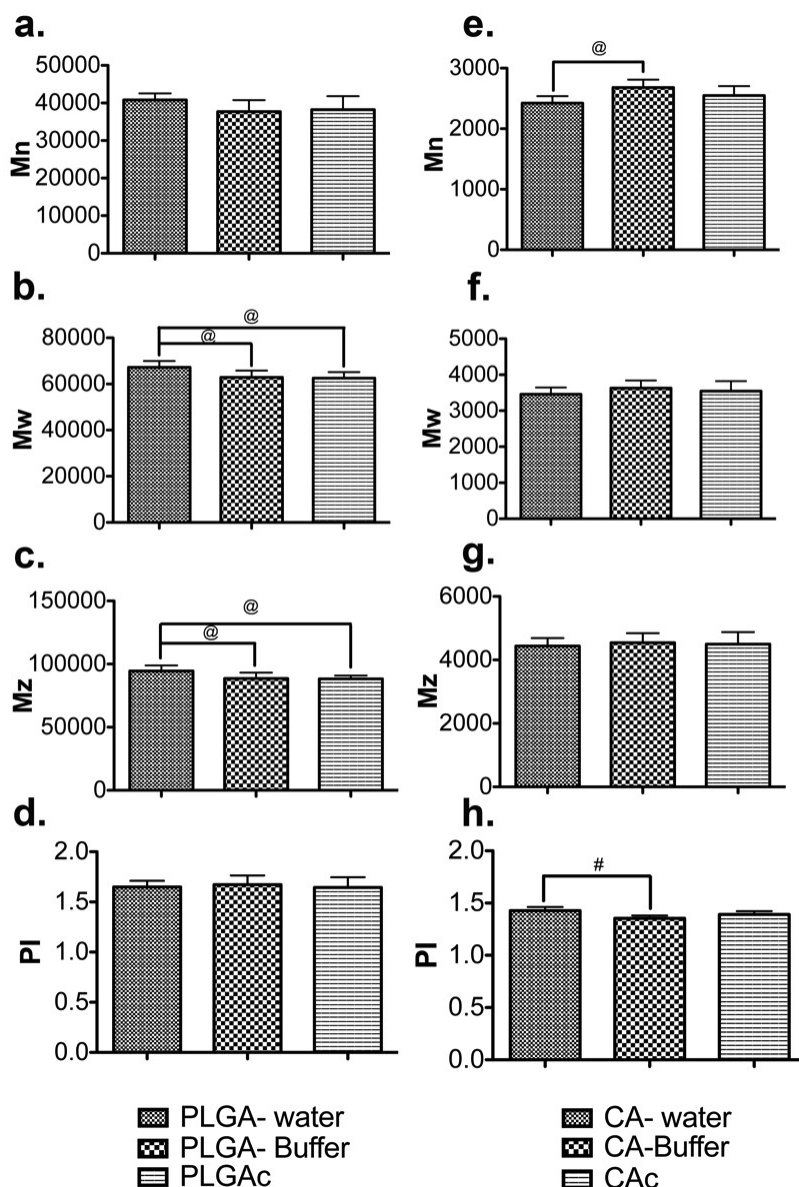

**Figure S3.** Molecular weights determined by Gel permeation chromatographic analysis of a), b), c), d) PLGA and e), f), g), h) CA polymers after treatments: a), e) Mn- Number average molecular weight, b), f) Mw- weight average molecular weight, c), g) Mz- z average molecular weight, d), h) PI- Polydispersity index= Mw/Mn). One – way ANOVA with Tukey post test, with 95% confidence intervals, \*P<0.001, #P<0.01, @P<0.05.

## Supplemental Data

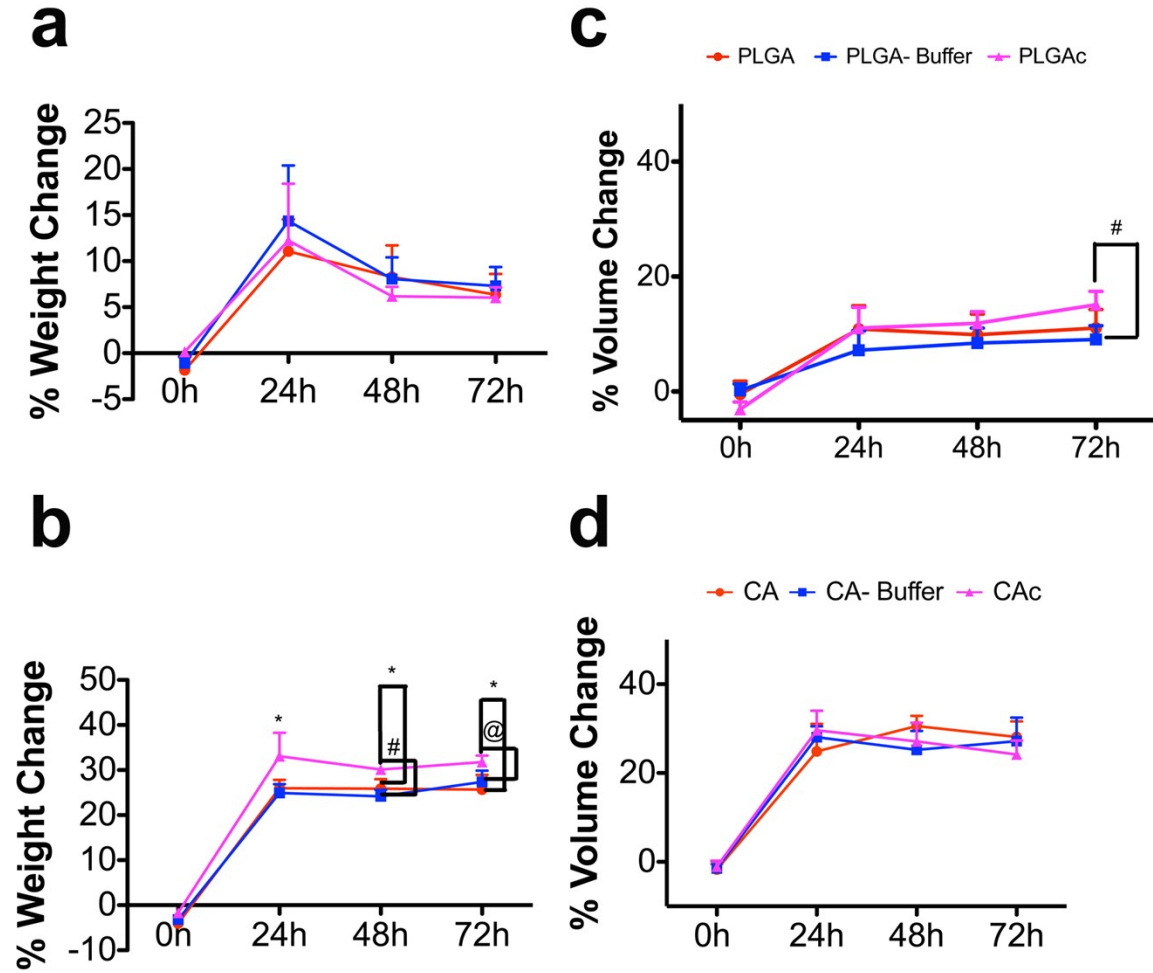

**Figure S4.** Effect of hydration on the scaffold weight and volume changes over 72 hours of incubation in PBS at 37°C. Changes in scaffold weight a) PLGA, PLGA- Buffer treated and PLGAc, b) CA, CA- Buffer treated and CAC. Changes in scaffold volume c) PLGA, PLGA- Buffer treated and PLGAc, d) CA, CA- Buffer treated and CAC. Two-way ANOVA with Bonferroni post- test, with 95% confidence intervals, \*P<0.001, #P<0.01, @P<0.05.

# Supplemental Data

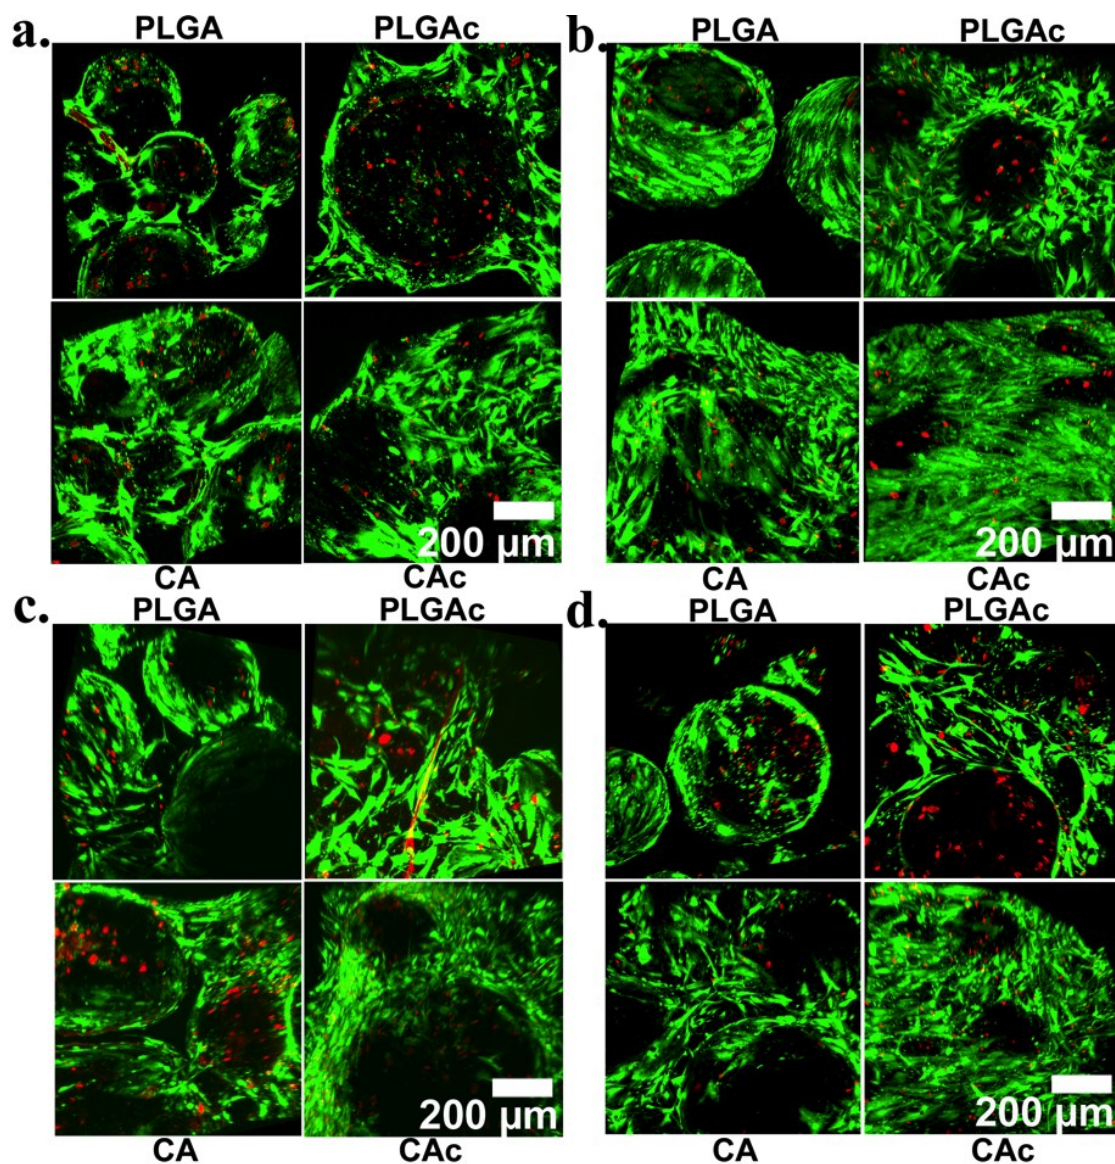

**Figure S5.** Live (green)/ dead (red) staining of cells on scaffolds at a) Day 3, b) Day 7, c) Day 14, d) Day 21. PLGA (top left) PLGA<sub>Ac</sub> (top right), CA (bottom left) and CA<sub>Ac</sub> (bottom right) show good viability of seeded hMSC throughout all culture time points.

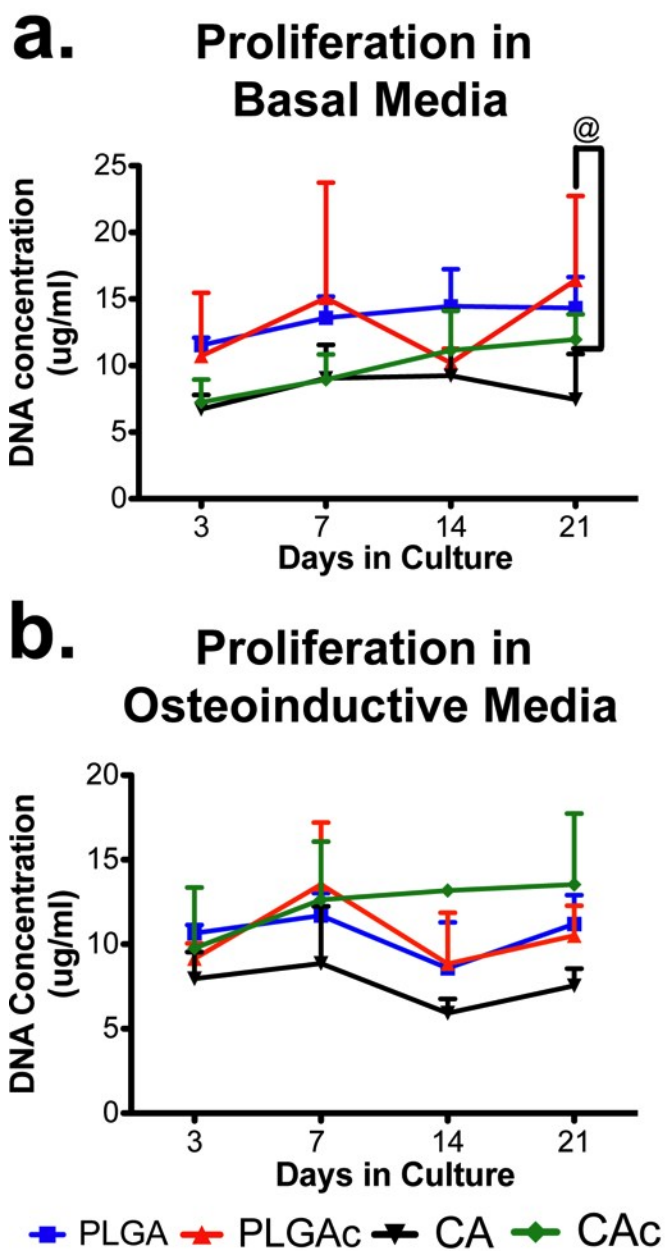

**Figure S6.** a) hMSC proliferation determined by pico- green assay over 21 days of culture in basal and b) osteoinduced condition. Two- way ANOVA with Bonferroni post- test, with 95% confidence intervals, \*P<0.001, #P<0.01, @P<0.05.

## Supplemental Data

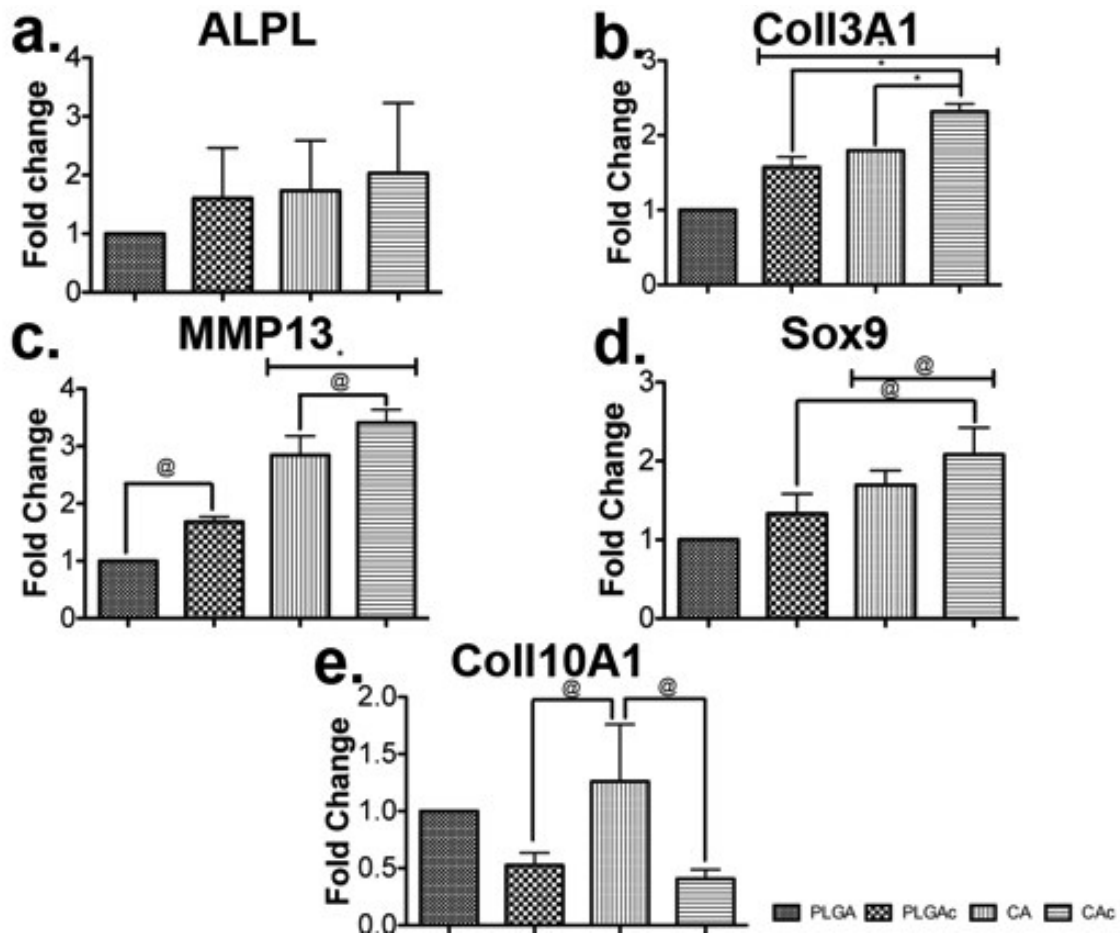

**Figure S7.** Osteochondral gene expression by osteoinduced hMSCs on PLGA, PLGAc, CA and CAc. a) ALPL- Alkaline phosphatase, b) Coll3A1- collagen 3A1, c) MMP13- Matrix metaloprotease 13, d) Sox9, e) Coll10A1- collagen 10A1. One – way ANOVA with Tukey posttest, with 95% confidence intervals, \*P<0.001, #P<0.01, @P<0.05

## Week 2

### a. Hematoxylin and Eosin

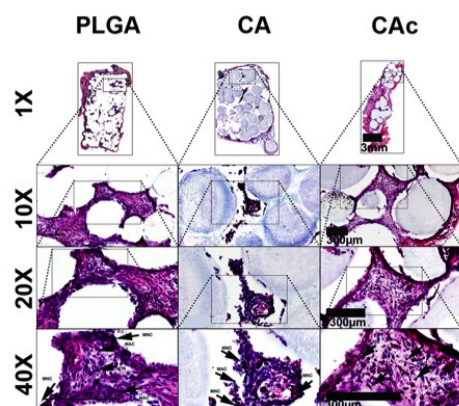

### c. Gomori Trichrome

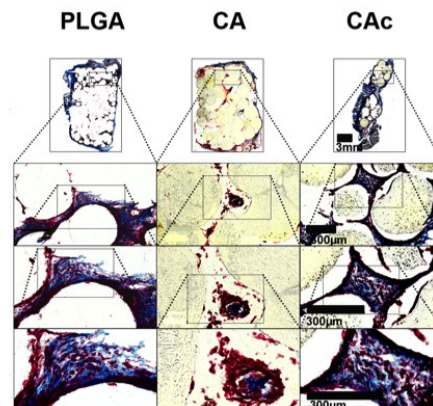

## Week 4

### b. Hematoxylin and Eosin

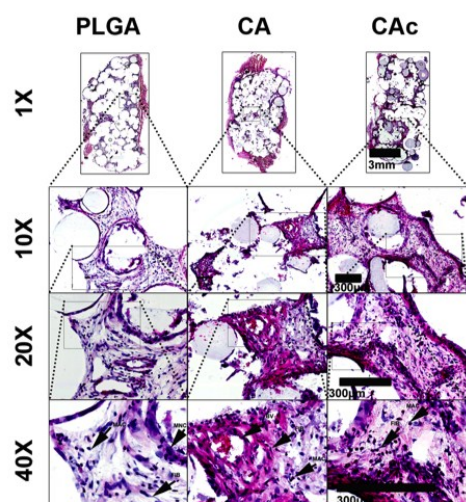

### d. Gomori Trichrome

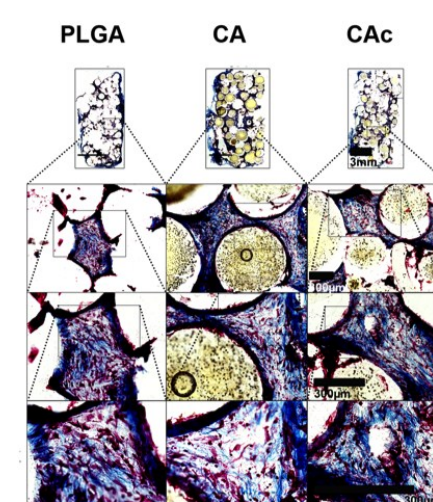

**Figure S8.** Histological staining of subcutaneously implanted PLGA, CA and CAC at early time points. (a, c- at 2 weeks , b, d- at 4 weeks ). a), b)- Hematoxylin and eosin staining, c), d)- Gomori trichrome staining. Scalebars on 1X magnification = 3mm, scalebar on 20X and 40X magnifications= 300 µm.

## Week 8

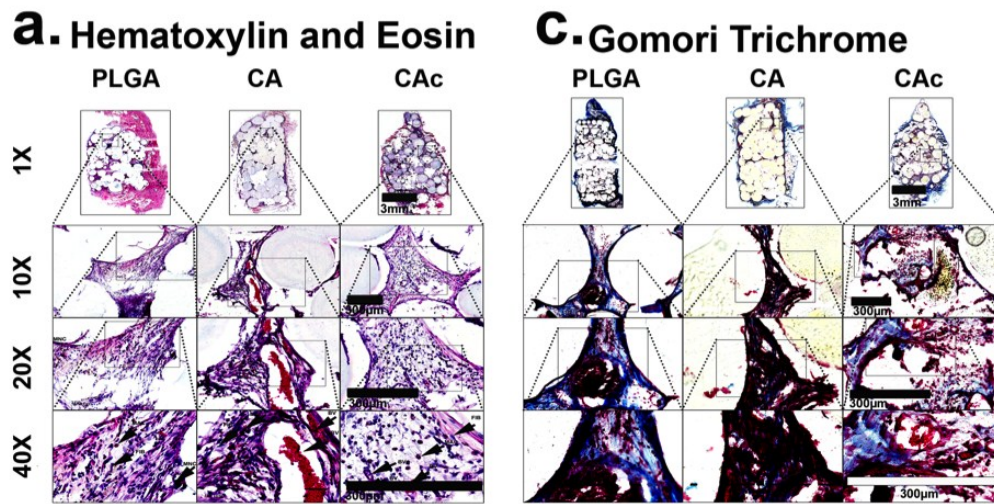

## Week 12

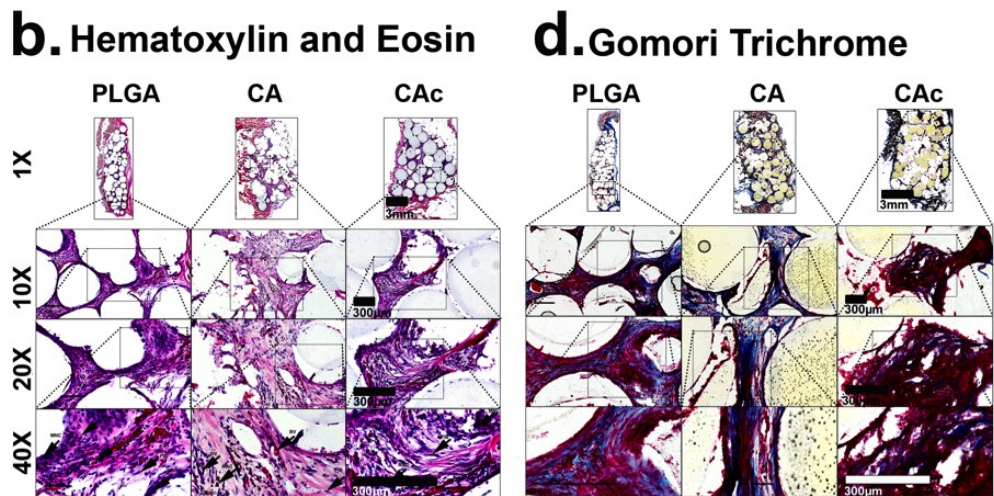

**Figure S9.** Histological staining of subcutaneously implanted PLGA, CA and CAc at late time points (a,c- at 8 weeks, b,d- at 12 weeks). a), b) Hematoxylin and eosin staining, c), d) Gomori trichrome staining. Scalebars on 1X magnification = 3mm, scalebar on 20X and 40X magnifications= 300 µm.

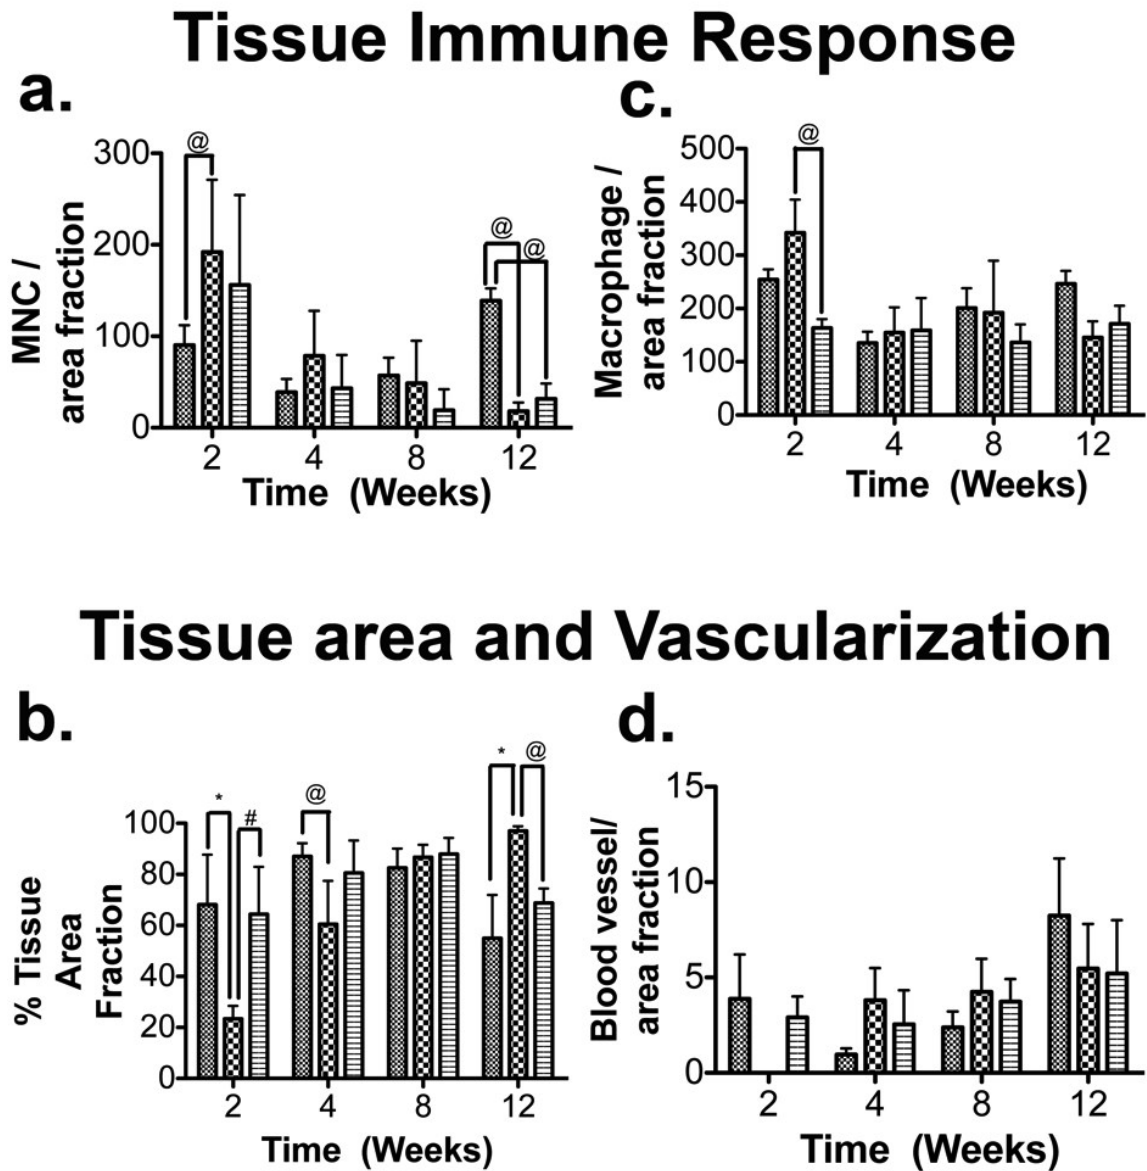

**Figure S10.** Histomorphometric analysis of implanted scaffolds over time- Immune response represented by a) multinucleated giant cells (MNCs), and, b) percentage tissue area, c) macrophages and d) number of blood vessels. Two- way ANOVA with Bonferroni post- test, with 95% confidence intervals, \* $P < 0.001$ , # $P < 0.01$ , @ $P < 0.05$ .
